# Supplementary material
Source: HighWire-hosted journal article supplement (http://www.cmaj.ca/highwire/filestream/79037/field_highwire_adjunct_files/0/191108-view-1-at.pdf)
Supplement: 191108-view-1-at.pdf [file 191108-view-1-at.pdf]

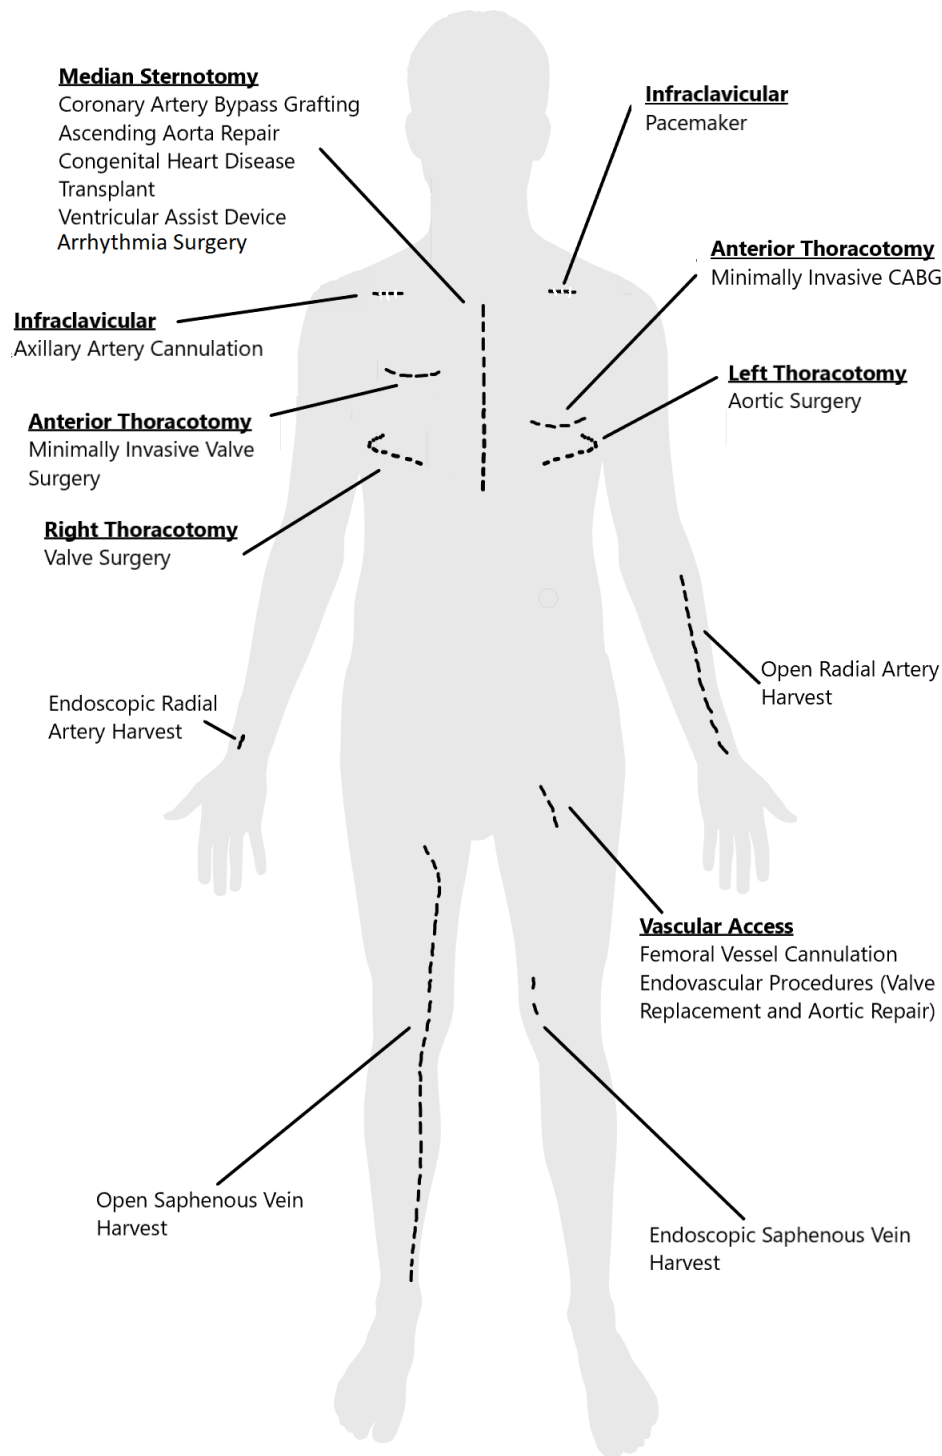

Surgical approaches to common cardiac procedures (CABG = coronary artery bypass grafting)
